# Supplementary material for: Rex Retroelements and Teleost Genomes: An Overview
Source: PubMed Central journal article supplement (PMC6274825; doi:10.3390/ijms19113653), 2018-11-20
Supplement: ijms-19-03653-s001.pdf [file ijms-19-03653-s001.pdf]

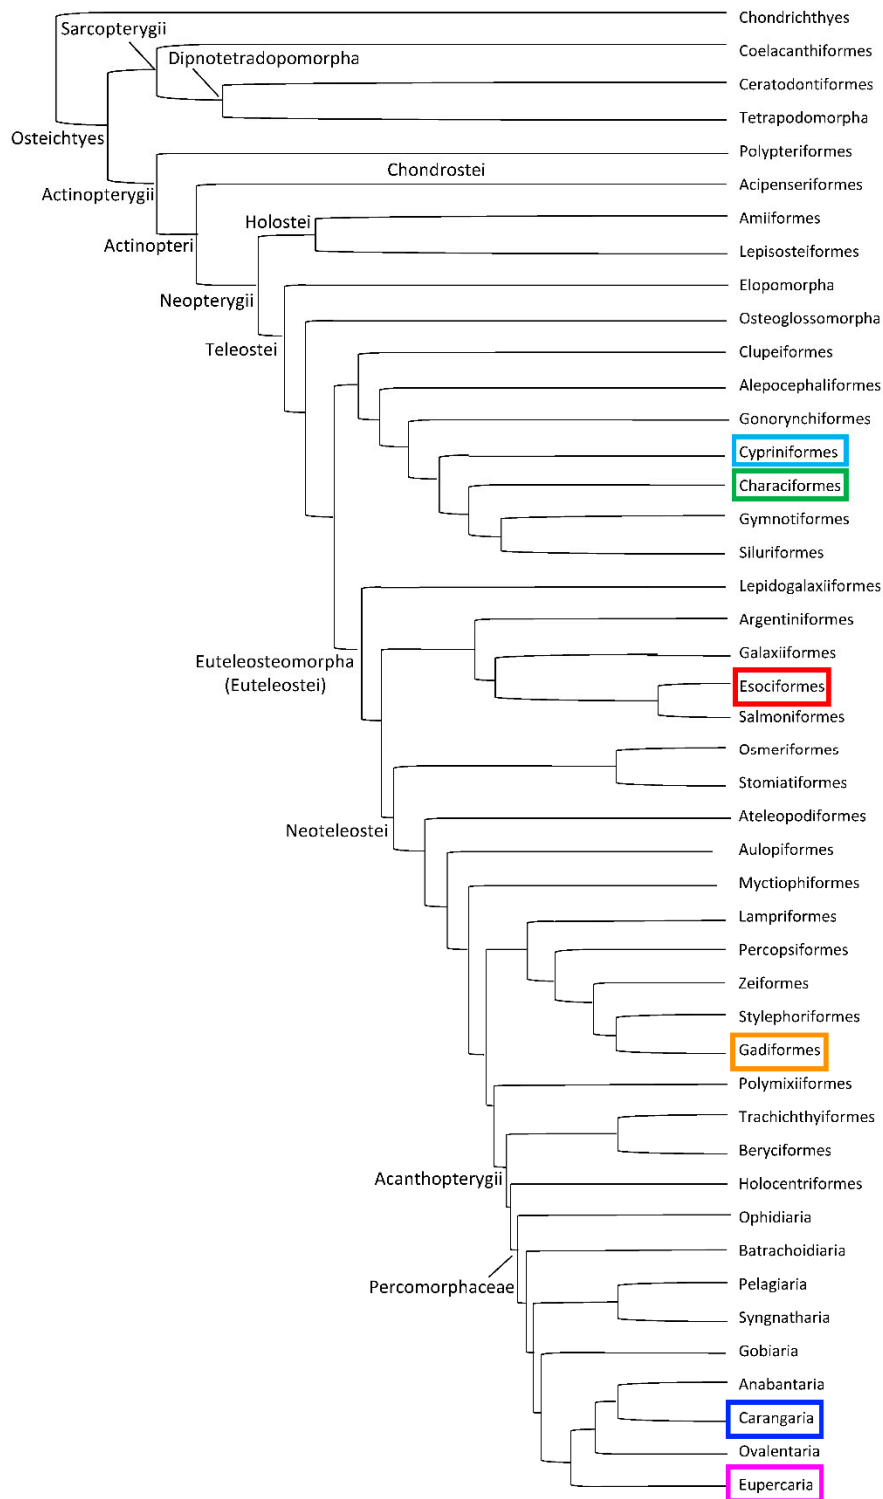

**Figure S1.** Cladogram showing the relationships of bony fishes [66]. Taxa of species named in the text are highlighted by colored boxes.
